# Supplementary material for: Beyond nanoparticle-based oral drug delivery: transporter-mediated absorption and disease targeting
Source: Royal Society of Chemistry journal article supplement (doi:10.1039/d4bm00313f), 2024-01-01
Supplement: d4bm00313f1.pdf [file d4bm00313f1.pdf]

## Supporting Information

### **Beyond nanoparticle-based oral drug delivery: transporter-mediated absorption and disease targeting**

Hana Cho<sup>a,†</sup>, Kang Moo Huh<sup>b,†</sup>, Hyun Ji Cho<sup>a</sup>, Bogeon Kim<sup>a</sup>, Min Suk Shim<sup>c</sup>, Yong-Yeon Cho<sup>a,d</sup>, Joo Young Lee<sup>a,d</sup>, Hye Suk Lee<sup>a,d</sup>, Young Jik Kwon<sup>e</sup>, Han Chang Kang<sup>a,d,\*</sup>

<sup>a</sup> Department of Pharmacy, College of Pharmacy, The Catholic University of Korea, Bucheon, 14662, Republic of Korea

<sup>b</sup> Department of Polymer Science and Engineering & Materials Science and Engineering, Chungnam National University, Daejeon 34134, Republic of Korea

<sup>c</sup> Division of Bioengineering, Incheon National University, Incheon 22012, Republic of Korea

<sup>d</sup> Regulated Cell Death (RCD) Control·Material Research Institute, The Catholic University of Korea, Bucheon, 14662, Republic of Korea

<sup>e</sup> Department of Pharmaceutical Sciences, University of California, Irvine, CA 92697, USA

<sup>†</sup> HC and KMH contributed equally to this work.

\* Corresponding author (HCK): [hckang@catholic.ac.kr](mailto:hckang@catholic.ac.kr)

**Supplemental Table 1.** A) Quantitative protein expression levels and B) relative mRNA expression levels of transporters/receptors in the human intestine<sup>1,2</sup>

| <b>A) Quantitative protein expression levels of transporters (fmol/mg membrane protein)</b> |                 |                |              |              |
|---------------------------------------------------------------------------------------------|-----------------|----------------|--------------|--------------|
| <b>Transporter</b>                                                                          | <b>Duodenum</b> | <b>Jejunum</b> | <b>Ileum</b> | <b>Colon</b> |
| <b>ABCB1</b>                                                                                | 371             | 657            | 796          | 499          |
| <b>ABCC3</b>                                                                                | 1115            | 577            | 711          | 2327         |
| <b>ASBT</b>                                                                                 | 35              | 196            | 1057         | 36           |
| <b>OATP2B1</b>                                                                              | 436             | 511            | 411          | 667          |
| <b>OCT1</b>                                                                                 | 736             | 655            | 728          | 613          |
| <b>OCT3</b>                                                                                 | 78              | 58             | 64           | 91           |
| <b>PEPT1</b>                                                                                | 2574            | 37220          | 4915         | 286          |
| <b>B) Relative mRNA expression levels of transporters</b>                                   |                 |                |              |              |
| <b>Transporter</b>                                                                          | <b>Duodenum</b> | <b>Ileum</b>   | <b>Colon</b> |              |
| <b>ASBT</b>                                                                                 | 0.09            | 0.42           | < 0.01       |              |
| <b>CNT1</b>                                                                                 | 0.06            | 0.06           | < 0.01       |              |
| <b>CNT2</b>                                                                                 | 0.32            | 0.15           | < 0.01       |              |
| <b>ENT2</b>                                                                                 | < 0.01          | < 0.01         | 0.09         |              |
| <b>OATP2B1</b>                                                                              | 0.02            | 0.06           | 0.08         |              |
| <b>OCTN1</b>                                                                                | 0.53            | 1.27           | 1.99         |              |
| <b>OCTN2</b>                                                                                | 0.09            | 0.10           | 0.82         |              |
| <b>PEPT1</b>                                                                                | 3.87            | 3.79           | 0.54         |              |
| <b>SERT</b>                                                                                 | 0.04            | 0.09           | < 0.01       |              |

**Supplemental Table 2.** The solubility of substrate candidates for transporter/receptor-mediated oral drug delivery

| Transporter        | Slightly soluble (> 1 mg/mL)                                                                                                                                                                                                                                                                                                 | Very slightly soluble or practically insoluble (< 1 mg/mL)                                                                                                                                                |
|--------------------|------------------------------------------------------------------------------------------------------------------------------------------------------------------------------------------------------------------------------------------------------------------------------------------------------------------------------|-----------------------------------------------------------------------------------------------------------------------------------------------------------------------------------------------------------|
| ASBT               | Cholic acid sodium salt (150 mg/mL), deoxycholic acid sodium salt (330 mg/mL), glycolic acid sodium salt (200 mg/mL), taurocholic acid sodium salt (100 mg/mL)                                                                                                                                                               | Benzothiazepine (and derivatives)*, cholic acid (0.175 mg/mL), deoxycholic acid (0.044 mg/mL), naphthol derivatives (0.74 mg/mL)                                                                          |
| ATB <sup>0,+</sup> | Carnitine (32 mg/mL), propionyl-L-carnitine (10 mg/mL in acidic pH)                                                                                                                                                                                                                                                          | Acetylcarnitine (0.355 mg/mL)                                                                                                                                                                             |
| CNT2               | Adenosine (7 mg/mL), cladribine (4.52 mg/mL), didanosine (27.3 mg/mL), floxuridine (49 mg/mL), formycin B (10 mg/mL), inosine (47 mg/mL), mizoribine (20 mg/mL), ribavirin (20 mg/mL), uridine (50 mg/mL), zidovudine (53 mg/mL)                                                                                             | Clofarabine*, fluoropyrimidine (0.467 mg/mL), guanosine*                                                                                                                                                  |
| ENT1               | Adenosine (7 mg/mL), capecitabine (26 mg/mL), cladribine (4.52 mg/mL), cytosine (8 mg/mL), fialuridine (2 mg/mL), fludarabine (9.2 mg/mL), gemcitabine (19 mg/mL), ribavirin (20 mg/mL), uridine (50 mg/mL), thymidine (50 mg/mL), thymine (3.82 mg/mL)                                                                      | Guanine*, guanosine*                                                                                                                                                                                      |
| GLUT2              | Glucose (133 mg/mL)                                                                                                                                                                                                                                                                                                          | -                                                                                                                                                                                                         |
| GLUT5              | Fructose (36 mg/mL)                                                                                                                                                                                                                                                                                                          | -                                                                                                                                                                                                         |
| MCT1               | $\beta$ -D-Hydroxybutyric acid (25 mg/mL in PBS), $\gamma$ -hydroxybutyric acid (494 mg/mL), L-lactic acid (100 mg/mL), pyruvic acid (1g/mL), salicylates (2.24 mg/mL), valproic acid (1.3 mg/mL)                                                                                                                            | Nateglinide (0.0088 mg/mL)                                                                                                                                                                                |
| OATP2B1            | Aliskiren (100 mg/mL), fexofenadine (2 mg/mL)                                                                                                                                                                                                                                                                                | Amiodarone (0.72 mg/mL), atorvastatin (0.0204 mg/mL), bosentan (0.01 mg/mL), DHEAS (0.0081 mg/mL), estrone-3-sulphate*, glibenclamide*, talinolol (0.0451 mg/mL), telmisartan*, L-thyroxine (0.105 mg/mL) |
| OCTN1              | Acetylcholine (100 mg/mL), carnitine (32 mg/mL), doxorubicin hydrochloride (10 mg/mL), entecavir (2.4 mg/mL), ergothioneine (50 mg/mL), gabapentin (10 mg/mL), imatinib (200 mg/mL), ipratropium (83 mg/mL), metformin (33 mg/mL), oxaliplatin (6 mg/mL), pregabalin (36 mg/mL), pyrilamine (80 mg/mL), verapamil (25 mg/mL) | Mitoxantrone (0.734 mg/mL), quinidine (0.14 mg/mL), tiotropium (0.0176 mg/mL)                                                                                                                             |
| OCTN2              | Carnitine (32 mg/mL), cephaloridine (257.7 mg/mL), emetine (100 mg/mL), entecavir (2.4 mg/mL), imatinib (200 mg/mL), ipratropium (83 mg/mL), verapamil (25 mg/mL)                                                                                                                                                            | Etoposide*, spironolactone*, tiotropium (0.0176 mg/mL)                                                                                                                                                    |
| OST $\alpha/\beta$ | Cholic acid sodium salt (150 mg/mL), deoxycholic acid sodium salt (330 mg/mL), glycolic acid sodium salt (200 mg/mL), PGE2 (1.05 mg/mL), taurocholic acid sodium salt (100 mg/mL)                                                                                                                                            | Cholic acid (0.175 mg/mL), deoxycholic acid (0.044 mg/mL), DHEAS (0.0081 mg/mL), digoxin*                                                                                                                 |
| PAT1               | Betaine (50 mg/mL), L-tryptophan (11.4 mg/mL)                                                                                                                                                                                                                                                                                | -                                                                                                                                                                                                         |
| PCFT               | -                                                                                                                                                                                                                                                                                                                            | Folic acid (0.01 mg/mL), 5-Methyltetrahydrofolate*                                                                                                                                                        |
| PEPT1              | 5-Aminolevulinic acid (50 mg/mL), carnosine (125 mg/mL), cephalixin (10 mg/mL), penicillin G (benzylpenicillin) (100 mg/mL), D-Phe-Ala (14.11 mg/mL), valacyclovir (174 mg/mL)                                                                                                                                               | Cefadroxil (0.399 mg/mL), glibenclamide*, nateglinide (0.0088 mg/mL)                                                                                                                                      |
| SGLT1              | Glucose (133 mg/mL), galactose (100 mg/mL)                                                                                                                                                                                                                                                                                   | -                                                                                                                                                                                                         |
| SMVT1              | Pantothenic acid (50 mg/mL)                                                                                                                                                                                                                                                                                                  | Biotin (0.22 mg/mL), lipoic acid*                                                                                                                                                                         |
| SVCT1              | L-Ascorbic acid (10 mg/mL) ( mg/mL)                                                                                                                                                                                                                                                                                          | -                                                                                                                                                                                                         |

\* : water insoluble

**Supplemental Table 3.** The change in the expression level of GI transporters/receptors in the status of disease<sup>3-25</sup>.

| Transporter                   | Disease                 | Species/cell line | mRNA                                  | Protein                                             |
|-------------------------------|-------------------------|-------------------|---------------------------------------|-----------------------------------------------------|
| <b>ASBT</b>                   | Diabetes                | Rat               | Ileum ↑                               | -                                                   |
|                               | IBD (UC)                | Human             | Colon (2.8-fold ↓)                    | -                                                   |
|                               | IBD (CD)                | Human             | -                                     | 31 % ↓                                              |
|                               | Obesity                 | Rat               | Ileum ↑                               | Ileum (3.0-fold ↓)                                  |
|                               | Obstructive cholestasis | Human             | Duodenum (4.0-fold ↓)                 | -                                                   |
| <b>FcRn</b>                   | Infection               | IPEC-J2           |                                       | ↑                                                   |
| <b>FR<math>\alpha</math></b>  | Colorectal cancer       | Human             |                                       | Colorectal Cancer ↑                                 |
| <b>FR<math>\beta</math></b>   | IBD                     | Human             |                                       | Macrophage cc                                       |
| <b>GLUT2</b>                  | Diabetes                | Human             | Duodenum (3-fold ↑)                   | -                                                   |
| <b>GLUT5</b>                  | Diabetes                | Human (T2DM)      | Duodenum (3-fold ↑)                   | 2.5-fold ↑                                          |
|                               | IBD (CD)                | Mouse             | Small intestine ↓                     |                                                     |
| <b>Mannose receptor</b>       | IBD                     | Human             |                                       | Macrophage ↑<br>Dendritic cell ↑                    |
| <b>MCT1</b>                   | Alzheimer disease       | APP/PS1<br>Mouse  | -                                     | Small intestine (1.9-fold ↓)                        |
|                               | IBD (CD)                | Human             | Colon (2.0-fold ↓)                    | Colon (3.9-fold ↓)                                  |
|                               | IBD (UC)                | Human             | Colon (3.0-fold ↓)                    | -                                                   |
| <b>OATP2B1</b>                | Cushing syndrome        | Human (T2DM)      | Duodenum (1.3-fold ↑)                 | -                                                   |
|                               | IBD (CD)                | Human             | Ileum (7-fold ↑)                      | -                                                   |
|                               | IBD (UC)                | Human             | Ileum (4-fold ↑)<br>Colon (13-fold ↑) | -                                                   |
| <b>OCTN2</b>                  | IBD (CD)                | Human             | Ileum (50.0-fold ↓)                   | -                                                   |
|                               | IBD (UC)                | Human             |                                       | Colon ↓                                             |
| <b>OST<math>\alpha</math></b> | IBD (UC)                | Human             | Colon (5.0-fold ↓)                    | -                                                   |
|                               | Cholestasis             | BDL-C57BL/6       | -                                     | Ileum (1.7-fold ↓)                                  |
| <b>OST<math>\beta</math></b>  | Cholestasis             | BDL-C57BL/6       | -                                     | Ileum (5.0-fold ↓)                                  |
|                               | IBD (UC)                | Human             | Colon (3.4-fold ↓)                    | -                                                   |
| <b>PCFT</b>                   | Diabetes                | Rat               | Jejunum (12.3-fold ↑)                 | -                                                   |
| <b>PEPT1</b>                  | Cushing syndrome        | Caco-2            | -                                     | Membrane (1.8-fold ↑)                               |
|                               | Hyperthyroidism         | Caco-2            | 4.0-fold ↓                            | 3.5-fold ↓                                          |
|                               | Hyperthyroidism         | Rat               | 1.4-fold ↓                            | 1.4-fold ↓                                          |
|                               | IBD                     | Human             | -                                     | Colon ↑                                             |
|                               | Obesity                 | Caco-2            | -                                     | Membrane (2.2-fold ↑)<br>Intracellular (2.0-fold ↓) |
| <b>SGLT1</b>                  | Diabetes                | Human             | Duodenum (3-fold ↑)                   | -                                                   |
| <b>SMVT</b>                   | IBD (UC)                | Mouse             | -                                     | Colon (4.0-fold ↓)                                  |
| <b>SVCT1</b>                  | IBD (UC)                | Human             | 2.94-fold ↓                           | -                                                   |
| <b>SVCT2</b>                  | IBD (CD)                | Human             | Ileum (7-fold ↑)<br>Colon (8-fold ↑)  | -                                                   |
|                               | IBD (CD)                | Rat               | -                                     | Colon (1.4-fold ↑)                                  |

\* IBD, inflammatory disease; CD, Crohn's disease; UC, Ulcerative colitis; T2DM, Type 2 diabetes mellitus; BDL, bile duct ligation

## References

1. M. Drozdziak and S. Oswald, *Current Medicinal Chemistry*, 2016, **23**, 4468-4489.
2. Y. Meier, J. J. Eloranta, J. Darimont, M. G. Ismail, C. Hiller, M. Fried, G. A. Kullak-Ublick and S. R. Vavricka, *Drug metabolism and Disposition*, 2007, **35**, 590-594.
3. M. Drozdziak, I. Czekawy, S. Oswald and A. Drozdziak, *Pharmacological Reports*, 2020, **72**, 1173-1194.
4. D. Jung, A. Fantin, U. Scheurer, M. Fried and G. Kullak-Ublick, *Gut*, 2004, **53**, 78-84.
5. P. Hruz, C. Zimmermann, H. Gutmann, L. Degen, U. Beuers, L. Terracciano, J. Drewe and C. Beglinger, *Gut*, 2006, **55**, 395-402.
6. F. Annaba, K. Ma, P. Kumar, A. K. Dudeja, R. D. Kineman, B. L. Shneider, S. Saksena, R. K. Gill and W. A. Alrefai, *American Journal of Physiology-Gastrointestinal and Liver Physiology*, 2010, **299**, G898-G906.
7. S. Sundaram, B. Palaniappan, N. Nepal, S. Chaffins, U. Sundaram and S. Arthur, *Cells*, 2019, **8**, 1197.
8. N. Patel, L. Ghali, I. Roitt, L. P. Munoz and R. Bayford, *Nanoscale Advances*, 2021, **3**, 5373-5386.
9. S. H. Lee, J. G. Song and H.-K. Han, *Acta Pharmaceutica Sinica B*, 2022, **12**, 4249-4261.
10. J. Skupsky, S. Sabui, M. Hwang, M. Nakasaki, M. D. Cahalan and H. M. Said, *Cellular and molecular gastroenterology and hepatology*, 2020, **9**, 557-567.
11. S. Pérez-Torras, I. Iglesias, M. Llopis, J. J. Lozano, M. Antolín, F. Guarner and M. Pastor-Anglada, *Journal of Crohn's and Colitis*, 2016, **10**, 850-859.
12. V. S. Subramanian, S. Sabui, G. A. Subramenium, J. S. Marchant and H. M. Said, *American Journal of Physiology-Gastrointestinal and Liver Physiology*, 2018, **315**, G241-G248.
13. Y. Fujita, H. Kojima, H. Hidaka, M. Fujimiya, A. Kashiwagi and R. Kikkawa, *Diabetologia*, 1998, **41**, 1459-1466.
14. J. Dyer, I. Wood, A. Palejwala, A. Ellis and S. Shirazi-Beechey, *American Journal of Physiology-Gastrointestinal and Liver Physiology*, 2002, **282**, G241-G248.
15. P. Liu, C. Gao, H. Chen, C. T. Vong, X. Wu, X. Tang, S. Wang and Y. Wang, *Acta Pharmaceutica Sinica B*, 2021, **11**, 2798-2818.
16. M. Fujiya, Y. Inaba, M. W. Musch, S. Hu, Y. Kohgo and E. B. Chang, *Inflammatory bowel diseases*, 2011, **17**, 907-916.
17. K. A. Wojtal, J. J. Eloranta, P. Hruz, H. Gutmann, J. Drewe, A. Staumann, C. Beglinger, M. Fried, G. A. Kullak-Ublick and S. R. Vavricka, *Drug Metabolism and Disposition*, 2009, **37**, 1871-1877.
18. M. Pyzik, L. K. Kozicky, A. K. Gandhi and R. S. Blumberg, *Nature Reviews Immunology*, 2023, 1-18.
19. T. M. Bui, H. L. Wiesolek and R. Sumagin, *Journal of Leucocyte Biology*, 2020, **108**, 787-799.
20. R. Thibault, P. De Coppet, K. Daly, A. Bourreille, M. Cuff, C. Bonnet, J. F. Mosnier, J. P. Galmiche, S. Shirazi-Beechey and J. P. Segain, *Gastroenterology*, 2007, **133**, 1916-1927.
21. C.-Y. Wang, S. Liu, X.-N. Xie and Z.-R. Tan, *Drug design, development and therapy*, 2017, 3511-3517.
22. S. A. Ingersoll, S. Ayyadurai, M. A. Charania, H. Laroui, Y. Yan and D. Merlin, *American Journal of Physiology-Gastrointestinal and Liver Physiology*, 2012, **302**, G484-G492.
23. G. D'Argenio, M. Calvani, A. Casamassimi, O. Petillo, S. Margarucci, M. Rienzo, I. Peluso, R. Calvani, A. Ciccodicola and N. Caporaso, *The FASEB journal*, 2006, **20**, 2544-2546.
24. S. Basu, C. Liu, X. K. Zhou, R. Nishiguchi, T. Ha, J. Chen, M. Johncilla, R. K. Yantiss, D. C. Montrose and A. J. Dannenberg, *Am J Physiol Gastrointest Liver Physiol*, 2021, **321**, G232-g242.
25. P. Li, Y. Wang, J. Luo, Q. Zeng, M. Wang, M. Bai, H. Zhou, J. Wang and H. Jiang, *Biochem Pharmacol*, 2020, **178**, 114115.
